# Supplementary material
Source: Research Square preprint supplement (doi:10.21203/rs.3.rs-10279865/v1)

Table 1: Table showing the least-squares mean coefficients of the models for different covariate combinations for threatened and non-threatened plants comparisons in the language editions of Wikipedia selected in the study. ‘Extinction risk contrast’ column shows the comparison of threatened and non-threatened species for each combination of documented use, range size (number of botanical countries) and local language Wikipedia used in each region. The table also includes standard error, degrees of freedom, z-ratio (standard deviation of a data point from the mean of the data distribution), p-value (statistical significance of the coefficient in the data distribution), significance level, direction (whether the coefficient value is significantly higher for threatened species (+), significantly higher for non-threatened species (-) or not significant (n.s.), language Wikipedia used and t ratio (statistical significance between two groups) for each combination.

| **contrast** | **factored_use** | **native_to_language_range** | **log_Areacode** | | **estimate** | **SE** | **df** | **t.ratio** | **p.value** | | **sig** | **dir** | **language** |
| --- | --- | --- | --- | --- | --- | --- | --- | --- | --- | --- | --- | --- | --- |
| Threatened - (Non-threatened) | 0 | 0 | 0 | | 2.126256 | 0.663466 | 3308 | 3.204768 | 0.001365 | | TRUE | + | Arabic |
| Threatened - (Non-threatened) | 1 | 0 | 0 | | 0.575941 | 0.63565 | 3308 | 0.906066 | 0.364967 | | FALSE | n.s. | Arabic |
| Threatened - (Non-threatened) | 0 | 1 | 0 | | 2.1636 | 0.681694 | 3308 | 3.173856 | 0.001518 | | TRUE | + | Arabic |
| Threatened - (Non-threatened) | 1 | 1 | 0 | | 0.613284 | 0.672202 | 3308 | 0.912351 | 0.36165 | | FALSE | n.s. | Arabic |
| Threatened - (Non-threatened) | 0 | 0 | 1 | | 2.166889 | 0.689374 | 3308 | 3.143273 | 0.001685 | | TRUE | + | Arabic |
| Threatened - (Non-threatened) | 1 | 0 | 1 | | 0.616574 | 0.339138 | 3308 | 1.818063 | 0.069145 | | FALSE | n.s. | Arabic |
| Threatened - (Non-threatened) | 0 | 1 | 1 | | 2.204232 | 0.730746 | 3308 | 3.016412 | 0.002577 | | TRUE | + | Arabic |
| Threatened - (Non-threatened) | 1 | 1 | 1 | | 0.653917 | 0.443907 | 3308 | 1.473095 | 0.140821 | | FALSE | n.s. | Arabic |
| Threatened - (Non-threatened) | 0 | 0 | 2 | | 2.207522 | 0.964366 | 3308 | 2.289092 | 0.022137 | | TRUE | + | Arabic |
| Threatened - (Non-threatened) | 1 | 0 | 2 | | 0.657206 | 0.495676 | 3308 | 1.32588 | 0.184971 | | FALSE | n.s. | Arabic |
| Threatened - (Non-threatened) | 0 | 1 | 2 | | 2.244865 | 1.01143 | 3308 | 2.219496 | 0.026521 | | TRUE | + | Arabic |
| Threatened - (Non-threatened) | 1 | 1 | 2 | | 0.69455 | 0.601638 | 3308 | 1.154431 | 0.248407 | | FALSE | n.s. | Arabic |
| Threatened - (Non-threatened) | 0 | 0 | 0 | | 0.611441 | 0.419796 | 4658 | 1.456521 | 0.145316 | | FALSE | n.s. | German |
| Threatened - (Non-threatened) | 1 | 0 | 0 | | 0.75281 | 0.345254 | 4658 | 2.180449 | 0.029274 | | TRUE | + | German |
| Threatened - (Non-threatened) | 0 | 1 | 0 | | 0.366251 | 0.873197 | 4658 | 0.419436 | 0.674917 | | FALSE | n.s. | German |
| Threatened - (Non-threatened) | 1 | 1 | 0 | | 0.507619 | 0.851621 | 4658 | 0.596062 | 0.551163 | | FALSE | n.s. | German |
| Threatened - (Non-threatened) | 0 | 0 | 1 | | 0.287365 | 0.424594 | 4658 | 0.6768 | 0.498567 | | FALSE | n.s. | German |
| Threatened - (Non-threatened) | 1 | 0 | 1 | | 0.428734 | 0.199441 | 4658 | 2.149675 | 0.031632 | | TRUE | + | German |
| Threatened - (Non-threatened) | 0 | 1 | 1 | | 0.042175 | 0.836279 | 4658 | 0.050431 | 0.959781 | | FALSE | n.s. | German |
| Threatened - (Non-threatened) | 1 | 1 | 1 | | 0.183543 | 0.760705 | 4658 | 0.24128 | 0.809349 | | FALSE | n.s. | German |
| Threatened - (Non-threatened) | 0 | 0 | 2 | | -0.03671 | 0.604841 | 4658 | -0.06069 | 0.951605 | | FALSE | n.s. | German |
| Threatened - (Non-threatened) | 1 | 0 | 2 | | 0.104658 | 0.376634 | 4658 | 0.277876 | 0.78112 | | FALSE | n.s. | German |
| Threatened - (Non-threatened) | 0 | 1 | 2 | | -0.2819 | 0.904296 | 4658 | -0.31174 | 0.755255 | | FALSE | n.s. | German |
| Threatened - (Non-threatened) | 1 | 1 | 2 | | -0.14053 | 0.783317 | 4658 | -0.17941 | 0.857625 | | FALSE | n.s. | German |
| Threatened - (Non-threatened) | 0 | 0 | 0 | | 0.067654 | 0.32388 | 19628 | 0.208887 | 0.834539 | | FALSE | n.s. | English |
| Threatened - (Non-threatened) | 1 | 0 | 0 | | 0.279022 | 0.330137 | 19628 | 0.845171 | 0.398026 | | FALSE | n.s. | English |
| Threatened - (Non-threatened) | 0 | 1 | 0 | | 0.486409 | 0.216296 | 19628 | 2.248815 | 0.024535 | | TRUE | + | English |
| Threatened - (Non-threatened) | 1 | 1 | 0 | | 0.697777 | 0.167049 | 19628 | 4.177072 | 2.9656079941068e-05 | | TRUE | + | English |
| Threatened - (Non-threatened) | 0 | 0 | 1 | | 0.287344 | 0.334902 | 19628 | 0.857994 | 0.390906 | | FALSE | n.s. | English |
| Threatened - (Non-threatened) | 1 | 0 | 1 | | 0.498712 | 0.297259 | 19628 | 1.677705 | 0.093421 | | FALSE | n.s. | English |
| Threatened - (Non-threatened) | 0 | 1 | 1 | | 0.706099 | 0.237221 | 19628 | 2.976547 | 0.002919 | | TRUE | + | English |
| Threatened - (Non-threatened) | 1 | 1 | 1 | | 0.917467 | 0.097502 | 19628 | 9.409735 | 5.50687142556956e-21 | | TRUE | + | English |
| Threatened - (Non-threatened) | 0 | 0 | 2 | | 0.507034 | 0.403311 | 19628 | 1.257179 | 0.208704 | | FALSE | n.s. | English |
| Threatened - (Non-threatened) | 1 | 0 | 2 | | 0.718402 | 0.333128 | 19628 | 2.156536 | 0.031054 | | TRUE | + | English |
| Threatened - (Non-threatened) | 0 | 1 | 2 | | 0.925789 | 0.330156 | 19628 | 2.804098 | 0.005051 | | TRUE | + | English |
| Threatened - (Non-threatened) | 1 | 1 | 2 | | 1.137157 | 0.185329 | 19628 | 6.135873 | 8.63154393261184e-10 | | TRUE | + | English |
| Threatened - (Non-threatened) | 0 | 0 | 0 | | 0.510895 | 0.29936 | 6919 | 1.706625 | 0.087937 | | FALSE | n.s. | Spanish |
| Threatened - (Non-threatened) | 1 | 0 | 0 | | 0.555477 | 0.269657 | 6919 | 2.05994 | 0.039442 | | TRUE | + | Spanish |
| Threatened - (Non-threatened) | 0 | 1 | 0 | | 0.65159 | 0.286063 | 6919 | 2.277783 | 0.02277 | | TRUE | + | Spanish |
| Threatened - (Non-threatened) | 1 | 1 | 0 | | 0.696172 | 0.262537 | 6919 | 2.651704 | 0.008027 | | TRUE | + | Spanish |
| Threatened - (Non-threatened) | 0 | 0 | 1 | | 0.583437 | 0.238603 | 6919 | 2.445222 | 0.014501 | | TRUE | + | Spanish |
| Threatened - (Non-threatened) | 1 | 0 | 1 | | 0.628019 | 0.157731 | 6919 | 3.981573 | 6.91618031018913e-05 | | TRUE | + | Spanish |
| Threatened - (Non-threatened) | 0 | 1 | 1 | | 0.724131 | 0.265875 | 6919 | 2.723579 | 0.006474 | | TRUE | + | Spanish |
| Threatened - (Non-threatened) | 1 | 1 | 1 | | 0.768713 | 0.206477 | 6919 | 3.723003 | 0.000198 | | TRUE | + | Spanish |
| Threatened - (Non-threatened) | 0 | 0 | 2 | | 0.655978 | 0.339833 | 6919 | 1.930295 | 0.053611 | | FALSE | n.s. | Spanish |
| Threatened - (Non-threatened) | 1 | 0 | 2 | | 0.70056 | 0.261312 | 6919 | 2.680938 | 0.007359 | | TRUE | + | Spanish |
| Threatened - (Non-threatened) | 0 | 1 | 2 | | 0.796672 | 0.388313 | 6919 | 2.051624 | 0.040244 | | TRUE | + | Spanish |
| Threatened - (Non-threatened) | 1 | 1 | 2 | | 0.841254 | 0.327993 | 6919 | 2.564852 | 0.010343 | | TRUE | + | Spanish |
| Threatened - (Non-threatened) | 0 | 0 | 0 | | 0.577803 | 0.258856 | 7213 | 2.23214 | 0.025636 | | TRUE | + | French |
| Threatened - (Non-threatened) | 1 | 0 | 0 | | 0.60234 | 0.238424 | 7213 | 2.526344 | 0.011547 | | TRUE | + | French |
| Threatened - (Non-threatened) | 0 | 1 | 0 | | 0.507181 | 0.321599 | 7213 | 1.57706 | 0.114826 | | FALSE | n.s. | French |
| Threatened - (Non-threatened) | 1 | 1 | 0 | | 0.531718 | 0.310864 | 7213 | 1.710453 | 0.087225 | | FALSE | n.s. | French |
| Threatened - (Non-threatened) | 0 | 0 | 1 | | 0.544142 | 0.213546 | 7213 | 2.548124 | 0.010851 | | TRUE | + | French |
| Threatened - (Non-threatened) | 1 | 0 | 1 | | 0.568678 | 0.141093 | 7213 | 4.03053 | 5.62236896944333e-05 | | TRUE | + | French |
| Threatened - (Non-threatened) | 0 | 1 | 1 | | 0.47352 | 0.299746 | 7213 | 1.579734 | 0.114212 | | FALSE | n.s. | French |
| Threatened - (Non-threatened) | 1 | 1 | 1 | | 0.498056 | 0.259854 | 7213 | 1.916678 | 0.055318 | | FALSE | n.s. | French |
| Threatened - (Non-threatened) | 0 | 0 | 2 | | 0.51048 | 0.332313 | 7213 | 1.536145 | 0.124547 | | FALSE | n.s. | French |
| Threatened - (Non-threatened) | 1 | 0 | 2 | | 0.535017 | 0.263064 | 7213 | 2.033787 | 0.04201 | | TRUE | + | French |
| Threatened - (Non-threatened) | 0 | 1 | 2 | | 0.439858 | 0.403118 | 7213 | 1.09114 | 0.275248 | | FALSE | n.s. | French |
| Threatened - (Non-threatened) | 1 | 1 | 2 | | 0.464395 | 0.353053 | 7213 | 1.315369 | 0.188428 | | FALSE | n.s. | French |
| Threatened - (Non-threatened) | 0 | 0 | 0 | | 0.426334 | 0.396897 | 1966 | 1.074168 | 0.282879 | | FALSE | n.s. | Italian |
| Threatened - (Non-threatened) | 1 | 0 | 0 | | 0.428297 | 0.351019 | 1966 | 1.220151 | 0.222554 | | FALSE | n.s. | Italian |
| Threatened - (Non-threatened) | 0 | 1 | 0 | | 0.636014 | 0.664485 | 1966 | 0.957154 | 0.338607 | | FALSE | n.s. | Italian |
| Threatened - (Non-threatened) | 1 | 1 | 0 | | 0.637977 | 0.654791 | 1966 | 0.974321 | 0.330017 | | FALSE | n.s. | Italian |
| Threatened - (Non-threatened) | 0 | 0 | 1 | | 0.346606 | 0.305657 | 1966 | 1.133972 | 0.256945 | | FALSE | n.s. | Italian |
| Threatened - (Non-threatened) | 1 | 0 | 1 | | 0.348569 | 0.20479 | 1966 | 1.702076 | 0.088899 | | FALSE | n.s. | Italian |
| Threatened - (Non-threatened) | 0 | 1 | 1 | | 0.556286 | 0.644946 | 1966 | 0.862531 | 0.3885 | | FALSE | n.s. | Italian |
| Threatened - (Non-threatened) | 1 | 1 | 1 | | 0.558249 | 0.621283 | 1966 | 0.898541 | 0.369007 | | FALSE | n.s. | Italian |
| Threatened - (Non-threatened) | 0 | 0 | 2 | | 0.266878 | 0.45004 | 1966 | 0.59301 | 0.553243 | | FALSE | n.s. | Italian |
| Threatened - (Non-threatened) | 1 | 0 | 2 | | 0.268841 | 0.365889 | 1966 | 0.734761 | 0.462573 | | FALSE | n.s. | Italian |
| Threatened - (Non-threatened) | 0 | 1 | 2 | | 0.476558 | 0.750721 | 1966 | 0.634801 | 0.525632 | | FALSE | n.s. | Italian |
| Threatened - (Non-threatened) | 1 | 1 | 2 | | 0.478521 | 0.718641 | 1966 | 0.665869 | 0.505573 | | FALSE | n.s. | Italian |
| Threatened - (Non-threatened) | 0 | 0 | 0 | | -0.73453 | 0.571023 | 1093 | -1.28634 | 0.198598 | | FALSE | n.s. | Japanese |
| Threatened - (Non-threatened) | 1 | 0 | 0 | | -0.73182 | 0.511845 | 1093 | -1.42978 | 0.153066 | | FALSE | n.s. | Japanese |
| Threatened - (Non-threatened) | 0 | 1 | 0 | | -1.15124 | 0.909105 | 1093 | -1.26635 | 0.205659 | | FALSE | n.s. | Japanese |
| Threatened - (Non-threatened) | 1 | 1 | 0 | | -1.14854 | 0.911841 | 1093 | -1.25958 | 0.208089 | | FALSE | n.s. | Japanese |
| Threatened - (Non-threatened) | 0 | 0 | 1 | | 0.03367 | 0.395497 | 1093 | 0.085132 | 0.932172 | | FALSE | n.s. | Japanese |
| Threatened - (Non-threatened) | 1 | 0 | 1 | | 0.036372 | 0.259353 | 1093 | 0.14024 | 0.888496 | | FALSE | n.s. | Japanese |
| Threatened - (Non-threatened) | 0 | 1 | 1 | | -0.38304 | 0.93792 | 1093 | -0.4084 | 0.683062 | | FALSE | n.s. | Japanese |
| Threatened - (Non-threatened) | 1 | 1 | 1 | | -0.38034 | 0.927148 | 1093 | -0.41023 | 0.681719 | | FALSE | n.s. | Japanese |
| Threatened - (Non-threatened) | 0 | 0 | 2 | | 0.801866 | 0.582236 | 1093 | 1.377219 | 0.168727 | | FALSE | n.s. | Japanese |
| Threatened - (Non-threatened) | 1 | 0 | 2 | | 0.804568 | 0.474101 | 1093 | 1.697039 | 0.089974 | | FALSE | n.s. | Japanese |
| Threatened - (Non-threatened) | 0 | 1 | 2 | | 0.385152 | 1.133643 | 1093 | 0.339747 | 0.734112 | | FALSE | n.s. | Japanese |
| Threatened - (Non-threatened) | 1 | 1 | 2 | | 0.387854 | 1.113545 | 1093 | 0.348305 | 0.727678 | | FALSE | n.s. | Japanese |
| Threatened - (Non-threatened) | 0 | 0 | 0 | | -0.54244 | 0.455174 | 4779 | -1.19171 | 0.233434 | | FALSE | n.s. | Portuguese |
| Threatened - (Non-threatened) | 1 | 0 | 0 | | -0.31022 | 0.309777 | 4779 | -1.00142 | 0.316672 | | FALSE | n.s. | Portuguese |
| Threatened - (Non-threatened) | 0 | 1 | 0 | | 0.086897 | 0.501884 | 4779 | 0.173141 | 0.862548 | | FALSE | n.s. | Portuguese |
| Threatened - (Non-threatened) | 1 | 1 | 0 | | 0.319114 | 0.435544 | 4779 | 0.73268 | 0.46379 | | FALSE | n.s. | Portuguese |
| Threatened - (Non-threatened) | 0 | 0 | 1 | | -0.00426 | 0.477419 | 4779 | -0.00892 | 0.992882 | | FALSE | n.s. | Portuguese |
| Threatened - (Non-threatened) | 1 | 0 | 1 | | 0.227958 | 0.208851 | 4779 | 1.091485 | 0.275115 | | FALSE | n.s. | Portuguese |
| Threatened - (Non-threatened) | 0 | 1 | 1 | | 0.625073 | 0.486386 | 4779 | 1.285138 | 0.198806 | | FALSE | n.s. | Portuguese |
| Threatened - (Non-threatened) | 1 | 1 | 1 | | 0.857291 | 0.318268 | 4779 | 2.693616 | 0.007093 | | TRUE | + | Portuguese |
| Threatened - (Non-threatened) | 0 | 0 | 2 | | 0.533917 | 0.618509 | 4779 | 0.863231 | 0.388054 | | FALSE | n.s. | Portuguese |
| Threatened - (Non-threatened) | 1 | 0 | 2 | | 0.766134 | 0.353773 | 4779 | 2.165607 | 0.030391 | | TRUE | + | Portuguese |
| Threatened - (Non-threatened) | 0 | 1 | 2 | | 1.163249 | 0.595931 | 4779 | 1.951985 | 0.050998 | | FALSE | n.s. | Portuguese |
| Threatened - (Non-threatened) | 1 | 1 | 2 | | 1.395467 | 0.383105 | 4779 | 3.642521 | 0.000273 | | TRUE | + | Portuguese |
| Threatened - (Non-threatened) | 0 | 0 | 0 | | 0.497987 | 0.428708 | 3277 | 1.161598 | 0.245483 | | FALSE | n.s. | Russian |
| Threatened - (Non-threatened) | 1 | 0 | 0 | | 0.467057 | 0.416066 | 3277 | 1.122557 | 0.261708 | | FALSE | n.s. | Russian |
| Threatened - (Non-threatened) | 0 | 1 | 0 | | 0.517801 | 0.480036 | 3277 | 1.07867 | 0.280814 | | FALSE | n.s. | Russian |
| Threatened - (Non-threatened) | 1 | 1 | 0 | | 0.486871 | 0.470085 | 3277 | 1.035708 | 0.300415 | | FALSE | n.s. | Russian |
| Threatened - (Non-threatened) | 0 | 0 | 1 | | 0.159786 | 0.330531 | 3277 | 0.483424 | 0.628827 | | FALSE | n.s. | Russian |
| Threatened - (Non-threatened) | 1 | 0 | 1 | | 0.128857 | 0.258362 | 3277 | 0.498745 | 0.617993 | | FALSE | n.s. | Russian |
| Threatened - (Non-threatened) | 0 | 1 | 1 | | 0.1796 | 0.398791 | 3277 | 0.450361 | 0.65248 | | FALSE | n.s. | Russian |
| Threatened - (Non-threatened) | 1 | 1 | 1 | | 0.14867 | 0.343163 | 3277 | 0.433236 | 0.664872 | | FALSE | n.s. | Russian |
| Threatened - (Non-threatened) | 0 | 0 | 2 | | -0.17841 | 0.561858 | 3277 | -0.31754 | 0.750852 | | FALSE | n.s. | Russian |
| Threatened - (Non-threatened) | 1 | 0 | 2 | | -0.20934 | 0.49129 | 3277 | -0.42611 | 0.670055 | | FALSE | n.s. | Russian |
| Threatened - (Non-threatened) | 0 | 1 | 2 | | -0.1586 | 0.607131 | 3277 | -0.26123 | 0.793932 | | FALSE | n.s. | Russian |
| Threatened - (Non-threatened) | 1 | 1 | 2 | | -0.18953 | 0.543613 | 3277 | -0.34865 | 0.727375 | | FALSE | n.s. | Russian |
| Threatened - (Non-threatened) | 0 | 0 | 0 | | 0.473083 | 0.476684 | 4004 | 0.992445 | 0.32104 | | FALSE | n.s. | Chinese |
| Threatened - (Non-threatened) | 1 | 0 | 0 | | 0.466619 | 0.437018 | 4004 | 1.067734 | 0.285705 | | FALSE | n.s. | Chinese |
| Threatened - (Non-threatened) | 0 | 1 | 0 | | 2.334026 | 1.139002 | 4004 | 2.049186 | 0.040509 | | TRUE | + | Chinese |
| Threatened - (Non-threatened) | 1 | 1 | 0 | | 2.327563 | 1.116491 | 4004 | 2.084712 | 0.037159 | | TRUE | + | Chinese |
| Threatened - (Non-threatened) | 0 | 0 | 1 | | 0.511049 | 0.364984 | 4004 | 1.400198 | 0.161531 | | FALSE | n.s. | Chinese |
| Threatened - (Non-threatened) | 1 | 0 | 1 | | 0.504586 | 0.250564 | 4004 | 2.013796 | 0.044098 | | TRUE | + | Chinese |
| Threatened - (Non-threatened) | 0 | 1 | 1 | | 2.371993 | 1.192906 | 4004 | 1.988416 | 0.046834 | | TRUE | + | Chinese |
| Threatened - (Non-threatened) | 1 | 1 | 1 | | 2.36553 | 1.156748 | 4004 | 2.044983 | 0.040922 | | TRUE | + | Chinese |
| Threatened - (Non-threatened) | 0 | 0 | 2 | | 0.549016 | 0.596133 | 4004 | 0.920963 | 0.357125 | | FALSE | n.s. | Chinese |
| Threatened - (Non-threatened) | 1 | 0 | 2 | 0.542552 | 0.500756 | 4004 | 1.083468 | 0.278666 | | FALSE | n.s. | Chinese | |
| Threatened - (Non-threatened) | 0 | 1 | 2 | 2.40996 | 1.365614 | 4004 | 1.764745 | 0.077683 | | FALSE | n.s. | Chinese | |
| Threatened - (Non-threatened) | 1 | 1 | 2 | 2.403496 | 1.32127 | 4004 | 1.819081 | 0.068974 | | FALSE | n.s. | Chinese | |

**Table S2:** Proportion of total species and page views across the top ten languages of Wikipedia. For each language, the total number of species and total page views are provided. The page views are shown in scientific notation, rounded off by two decimal points.


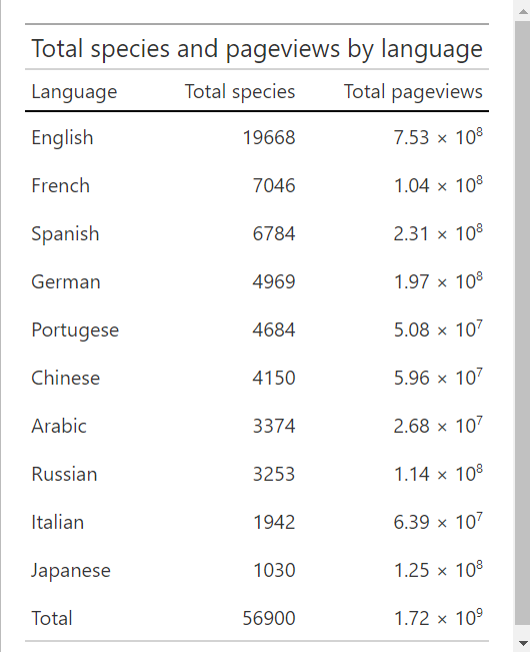


**Table S3:** List of all the R packages used for data acquisition, collation, analysis and visualisation and distribution map preparation.

| **R packages** | **References** |
| --- | --- |
| rWCVP | (Brown *et al.* 2023) |
| httr | (Wickham 2023) |
| jsonlite | (Ooms 2014) |
| tidyverse | (Wickham *et al.* 2019) |
| ggdist | (Kay 2024) |
| plotly | (Sievert 2020) |
| ggrepel | (Slowikowski 2016) |
| ggeffects | (Ludecke 2018) |
| DHARMa | (Hartig 2022) |
| MuMIn | (Bartoń 2010) |
| gt | (Sjoberg *et al.* 2021) |
| emmeans | (Lenth 2025) |
| cowplot | (Wilke and Wickham, 2019) |
| rnaturalearth | (Massicotte *et al.* 2023) |
| sf | (Pebesma and Bivand, 2023) |
| extrafont | (Chang 2025) |


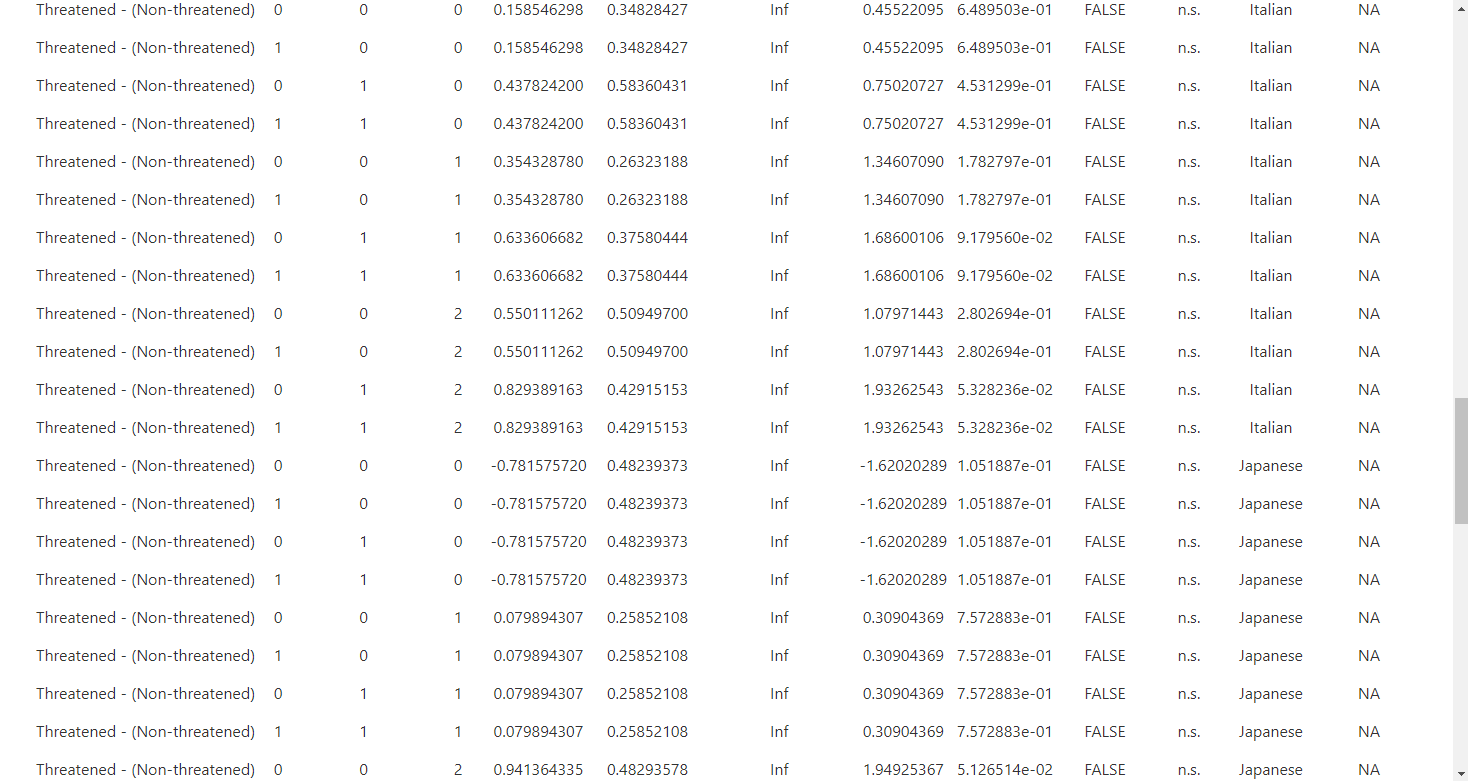

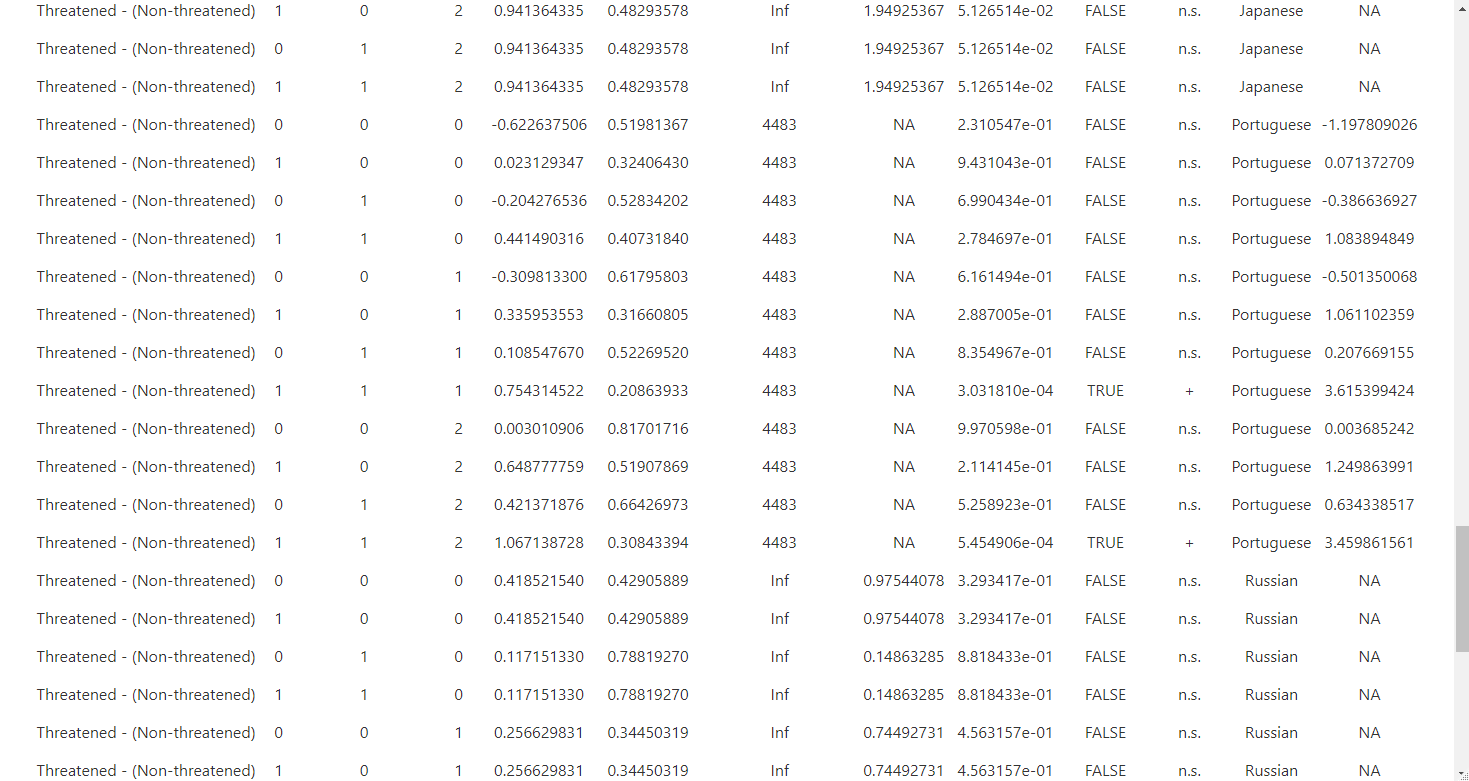

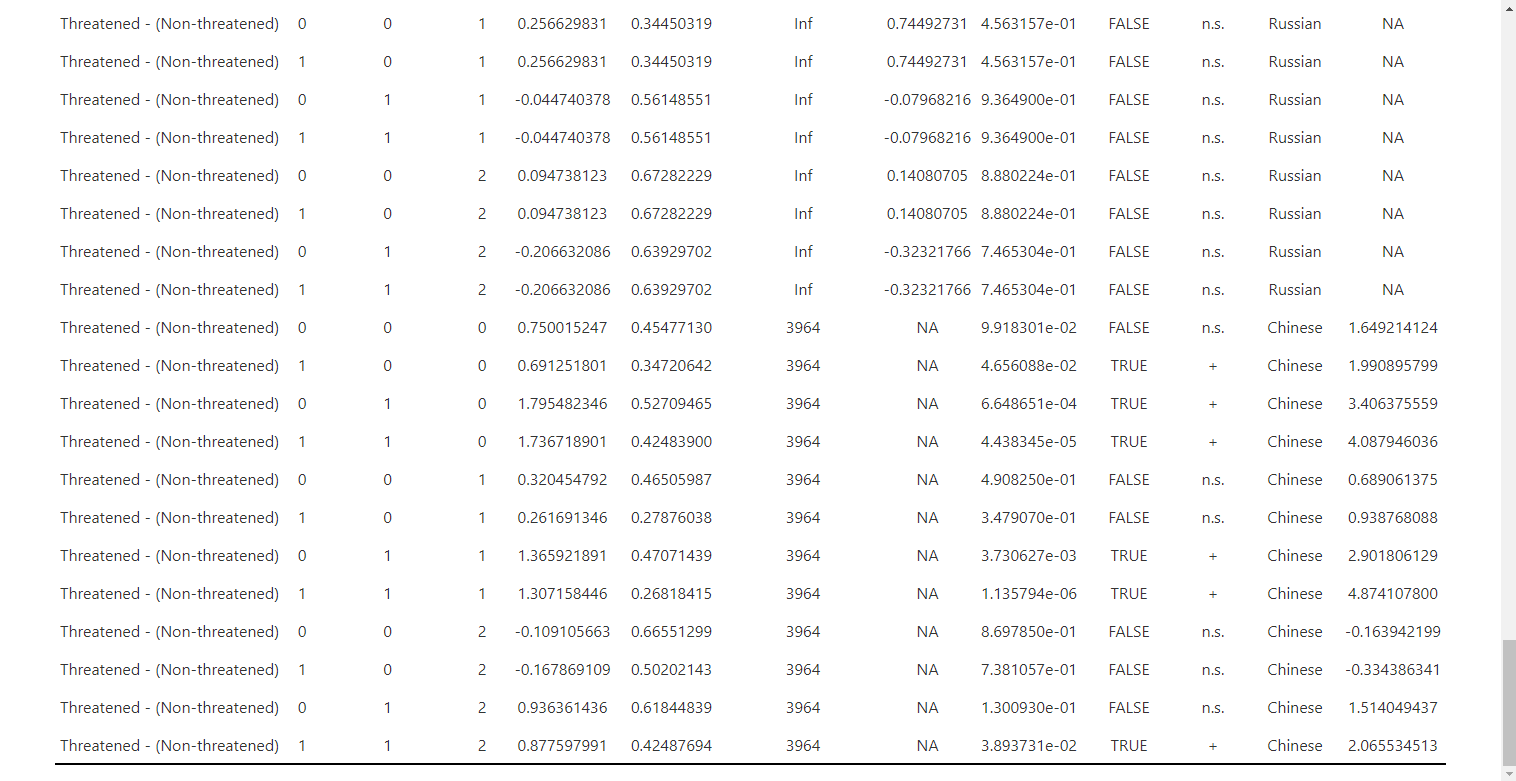

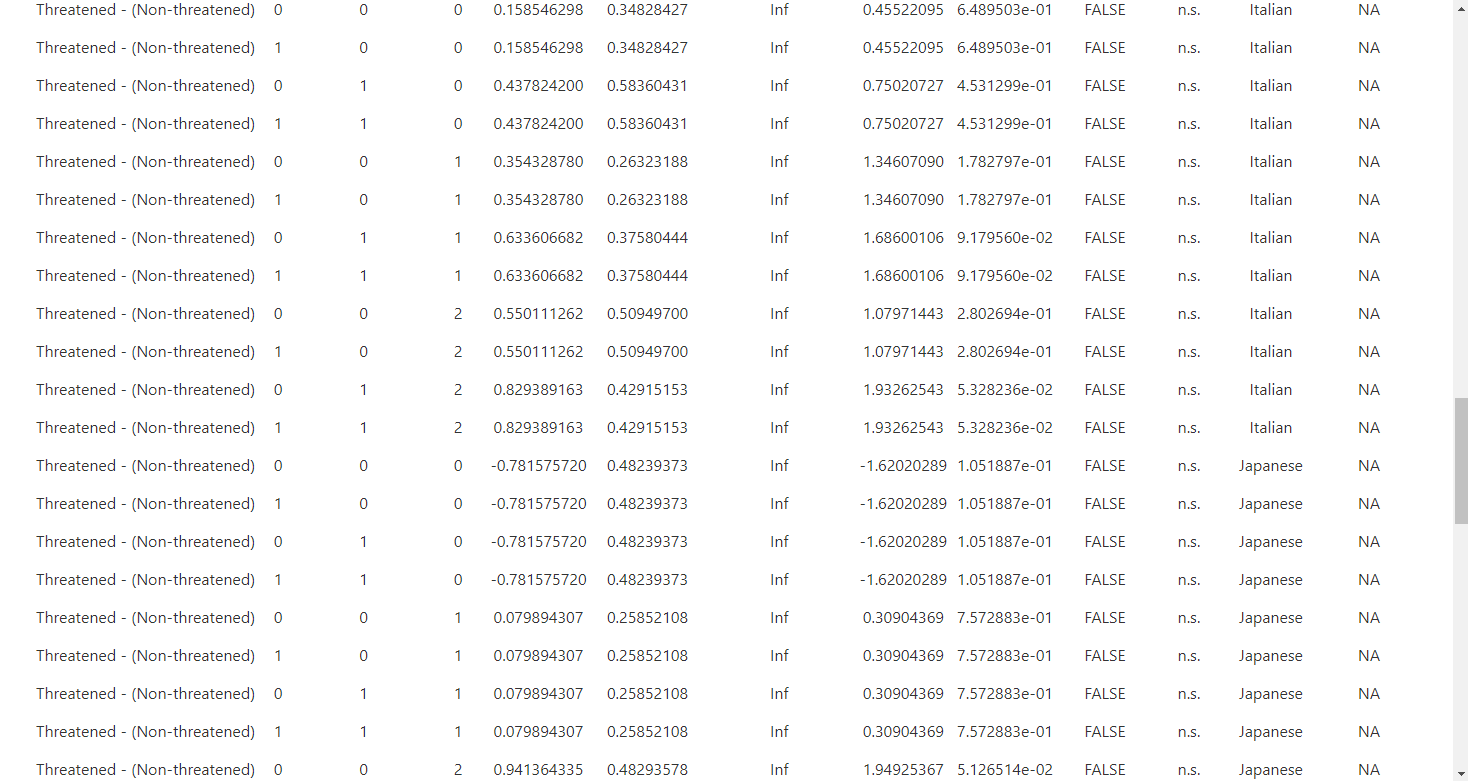

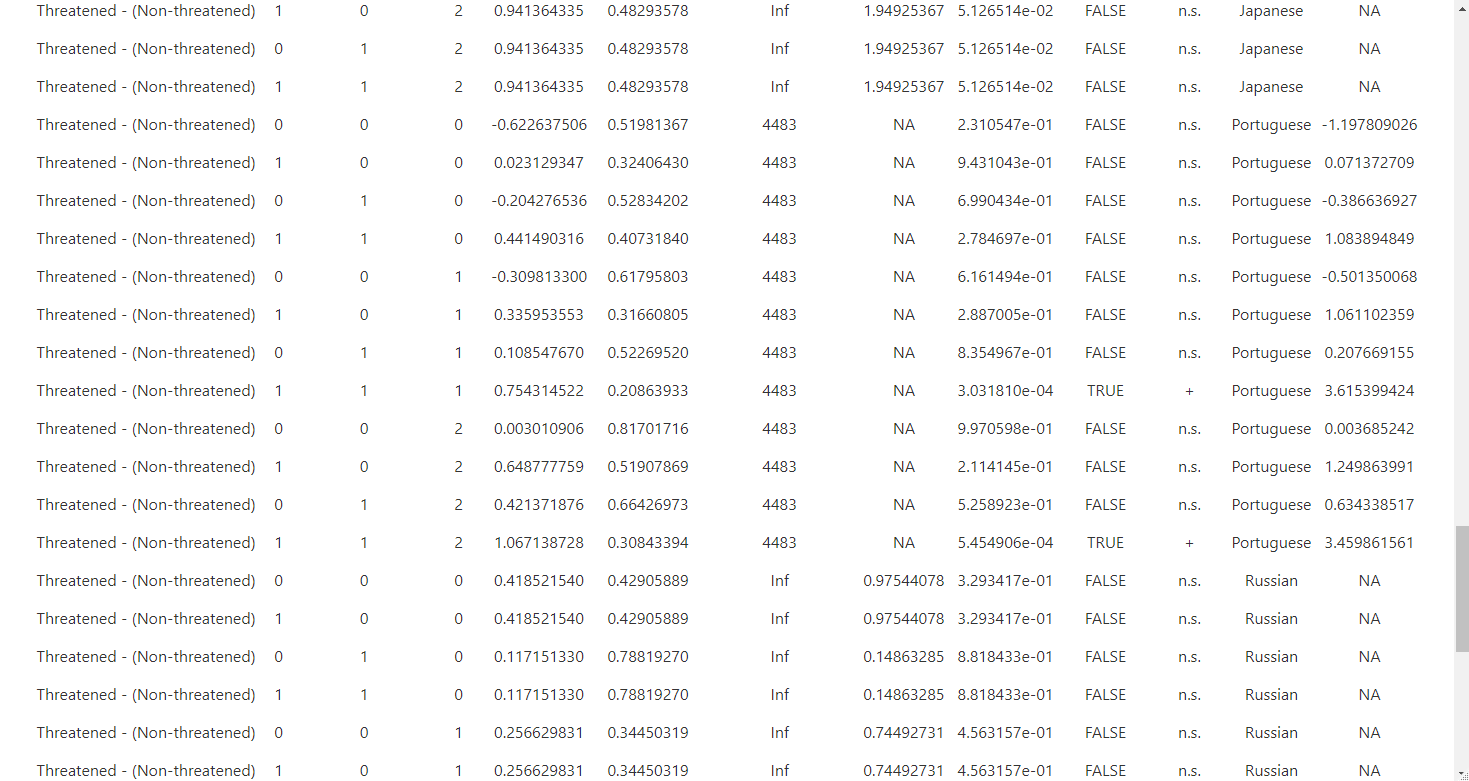

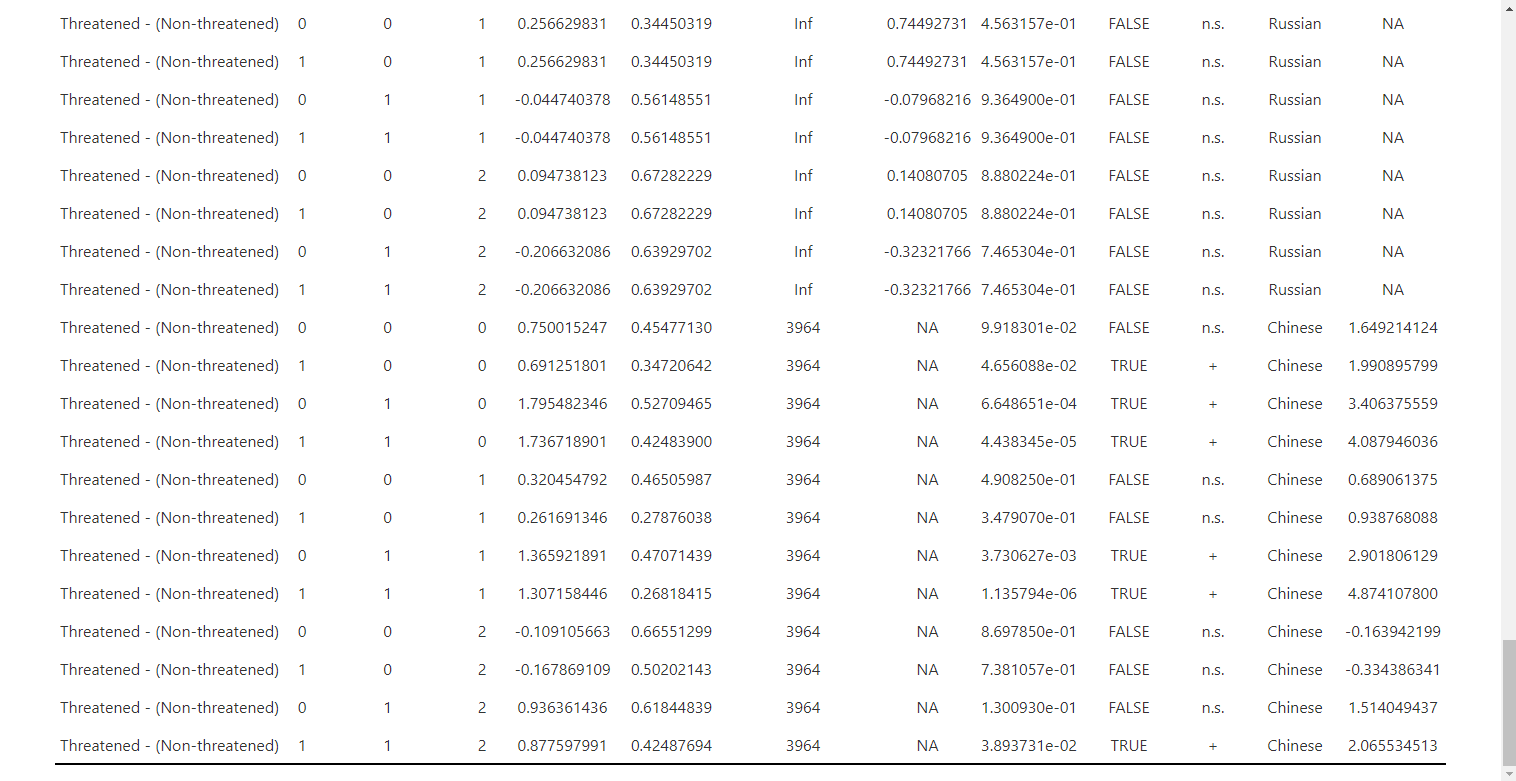

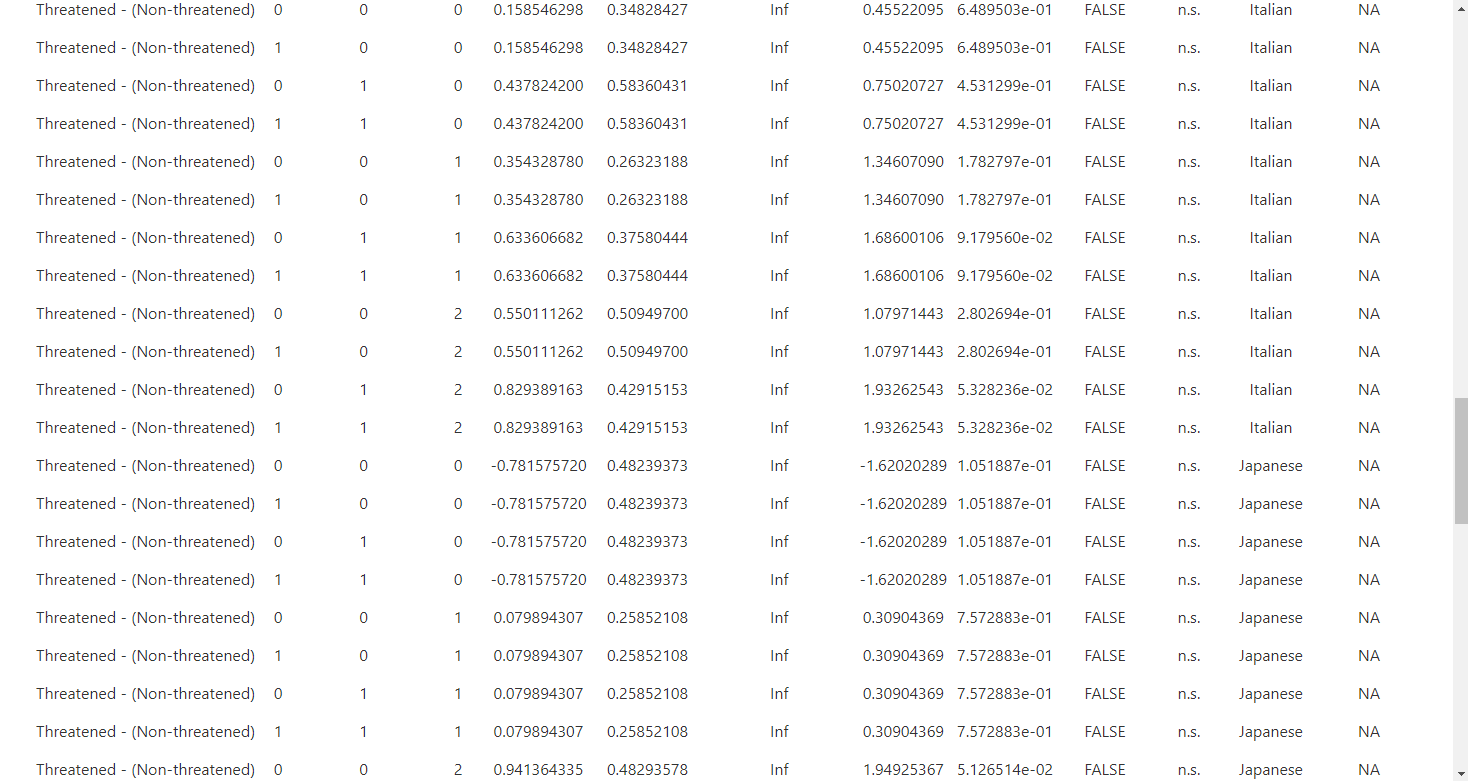

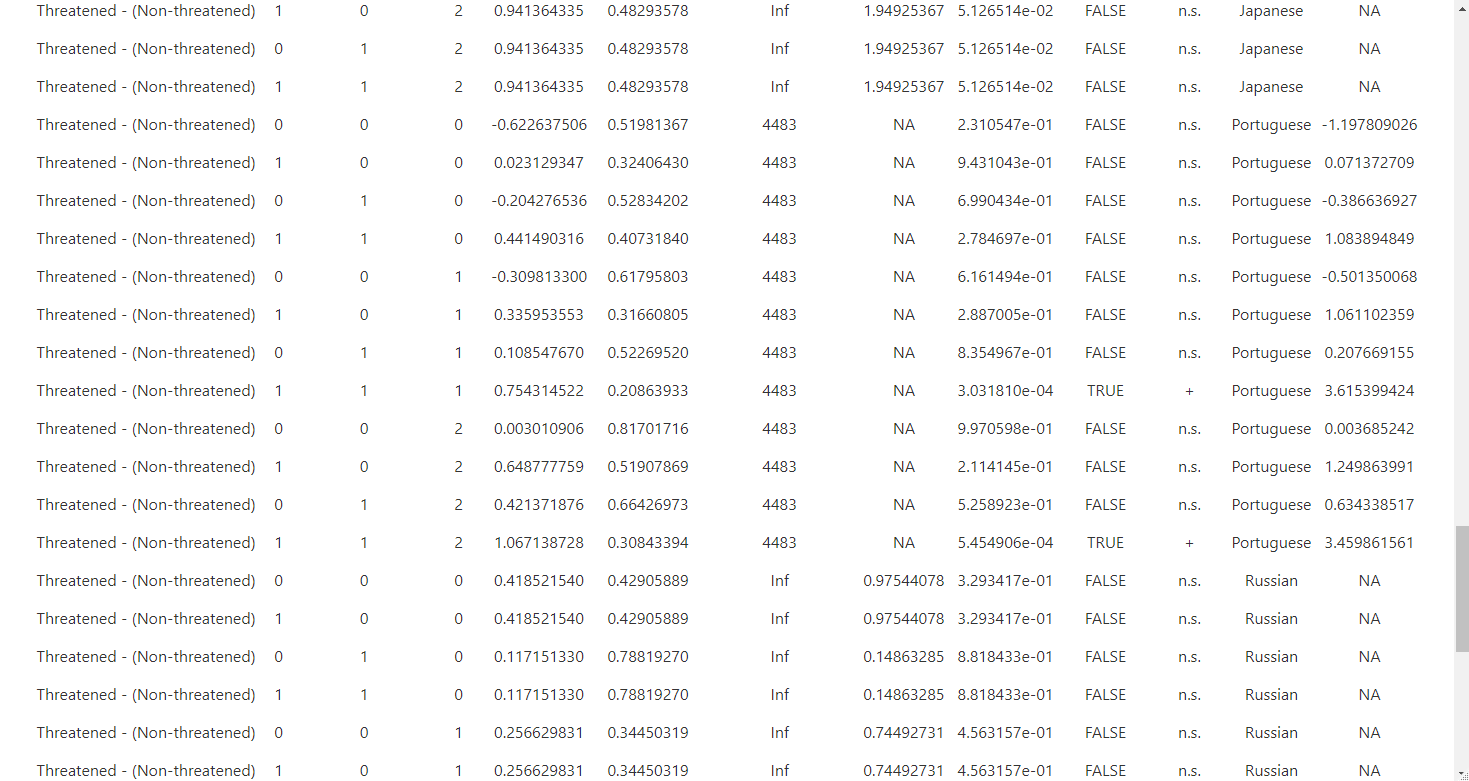

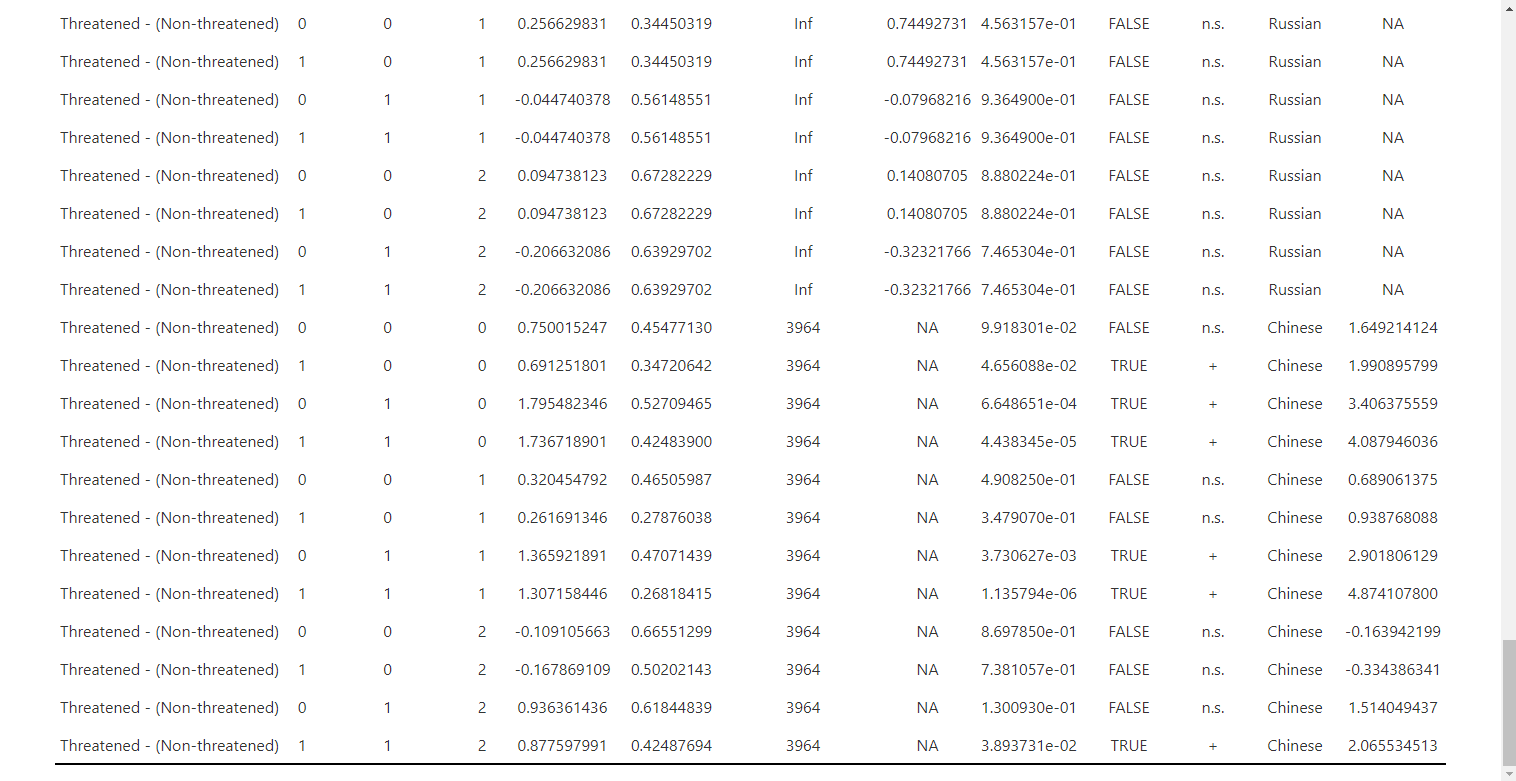

Supplement: Supplementary file 1 [file 03adb9171da6043fba3ea3ae.docx]
